# Supplementary material
Source: MDPI journal article supplement (https://www.mdpi.com/1996-1073/13/24/6730)
Supplement: s1 [file s1]

## Supplementary Materials

# CsPbBr<sub>3</sub> nanocrystals-based polymer nanocomposite films: effect of polymer on spectroscopic properties and moisture tolerance

Elisabetta Fanizza,<sup>1,2,\*</sup> Roberto Schingo,<sup>1</sup> Annamaria Panniello,<sup>2</sup> Angelica Maria Lanza,<sup>1</sup> Nicoletta Depalo,<sup>2</sup> Angela Agostiano,<sup>1,2</sup> Maria Lucia Curri,<sup>1,2</sup> Marinella Striccoli,<sup>2,\*</sup>

<sup>1</sup> Dipartimento di Chimica, Università degli Studi di Bari, Via Orabona 4, 70126 Bari, Italy, elisabetta.fanizza@uniba.it, schingo.roberto@gmail.com, a.lanza5@studenti.uniba.it, angela.agostiano@uniba.it, marialucia.curri@uniba.it,

<sup>2</sup> CNR-IPCF, SSO Bari, Via Orabona 4, 70126 Bari, Italy, a.panniello@ba.ipcf.cnr.it, n.depalo@ba.ipcf.cnr.it, m.striccoli@ba.ipcf.cnr.it

\* Correspondence: E.F elisabetta.fanizza@uniba.it; M.S m.striccoli@ba.ipcf.cnr.it

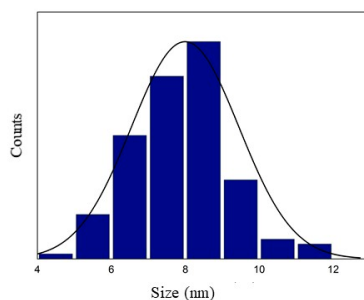

Figure S1. CsPbBr<sub>3</sub> nanocrystals size distribution by size statistical analysis of the TEM micrographs reported in Figure 1a in the main manuscript.

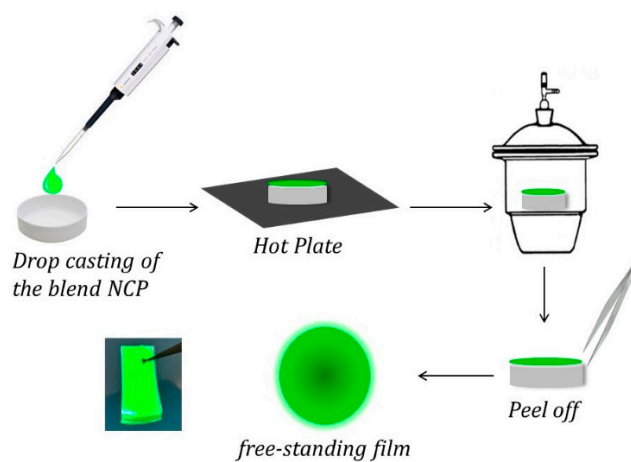

Figure S2. Sketch of the CsPbBr<sub>3</sub> nanocrystal/polymer blend processing into free-standing films.

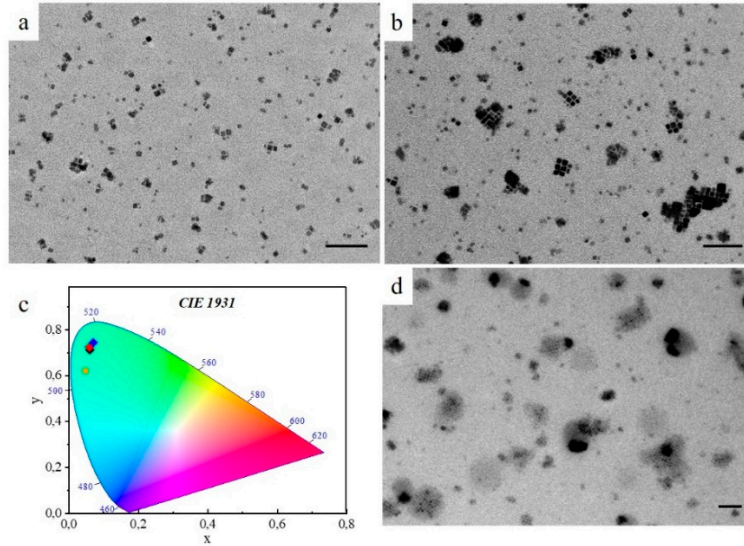

Figure S3. (a, b, d) TEM (scale bar 100 nm) micrographs of spin-coated blend of CsPbBr<sub>3</sub> NCs and polymethyl methacrylate (PMMA) 40mg (a), PMMA 80 mg (b) and polystyrene (PS) 80 mg and (c). Color point position in the CIE 1931 diagram of free-standing films composed by CsPbBr<sub>3</sub> (0.04 mmol) and PMMA 40 mg, 80 mg, 140 mg (black, red and blue symbol, respectively) compared to that of CsPbBr<sub>3</sub> NC thin film (yellow circle symbol)

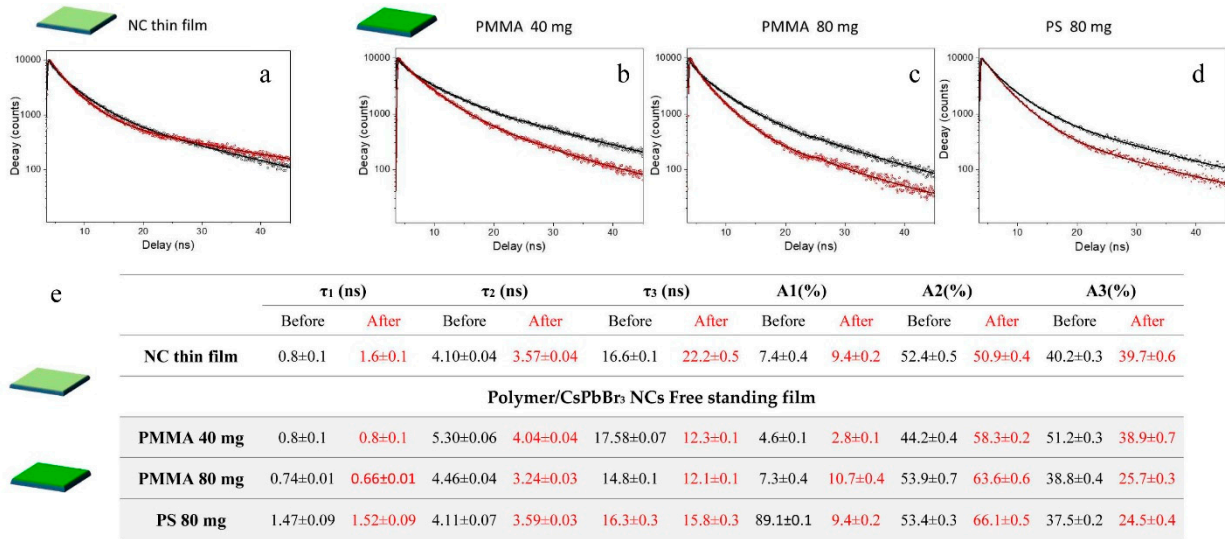

Figure S4. Time resolved photoluminescence decay of CsPbBr<sub>3</sub> NC thin spin coated film (a) and free-standing films (b-d) prepared with polymethyl methacrylate (PMMA 40 mg, b and 80 mg, c) or polystyrene (PS, d) before (black line) and after (red line) 280 hours of exposure to relative humidity RH%= 85%. The PL decay curves have been well-fitted with a triexponential function according to equation reported below, reducing the goodness of fit  $\chi R^2$  below to 1.2

$$A(t) = A_1 \exp\left(-\frac{t}{\tau_1}\right) + A_2 \exp\left(-\frac{t}{\tau_2}\right) + A_3 \exp\left(-\frac{t}{\tau_3}\right)$$

A, A<sub>1</sub>, A<sub>2</sub>, and A<sub>3</sub> are constants, t is time, and  $\tau_1$ ,  $\tau_2$ , and  $\tau_3$  represent the three decay lifetimes components. The value of the fitting parameters, reported in panel e, allow to calculate the average lifetime ( $\tau_{avg}$ ) reported in Figure 2 and in the table in Figure 3, in the main manuscript, as follows:

$$\tau_{avg} = \frac{A_1 \tau_1^2 + A_2 \tau_2^2 + A_3 \tau_3^2}{A_1 \tau_1 + A_2 \tau_2 + A_3 \tau_3}$$
